# Supplementary material for: An in situ-forming zwitterionic hydrogel as vitreous substitute
Source: Royal Society of Chemistry journal article supplement (doi:10.1039/c4tb01775g), 2014-12-04
Supplement: c4tb01775g1.pdf [file c4tb01775g1.pdf]

**Supplementary Information for**

***An in situ-forming zwitterionic hydrogel as vitreous substitute***

**Jing Chang<sup>1,3</sup>, Yong Tao<sup>2</sup>, Bin Wang<sup>2</sup>, Bao-hua Guo<sup>1</sup>, Hong Xu<sup>3</sup>, Yan-rong Jiang<sup>2\*</sup>, and Yanbin Huang<sup>1\*</sup>**

1. Key Laboratory of Advanced Materials (MOE), Department of Chemical Engineering, Tsinghua University, Beijing 100084, China
2. Department of Ophthalmology, People's Hospital, Peking University, Key Laboratory of Vision Loss and Restoration, Ministry of Education, Beijing 100044, China
3. College of Food Science and Light Industry, Nanjing Tech University, Nanjing 211816, China

\*Corresponding authors: Professor Yanbin Huang ([yanbin@tsinghua.edu.cn](mailto:yanbin@tsinghua.edu.cn)) and Professor Yan-rong Jiang ([drjyr@vip.sina.com](mailto:drjyr@vip.sina.com))

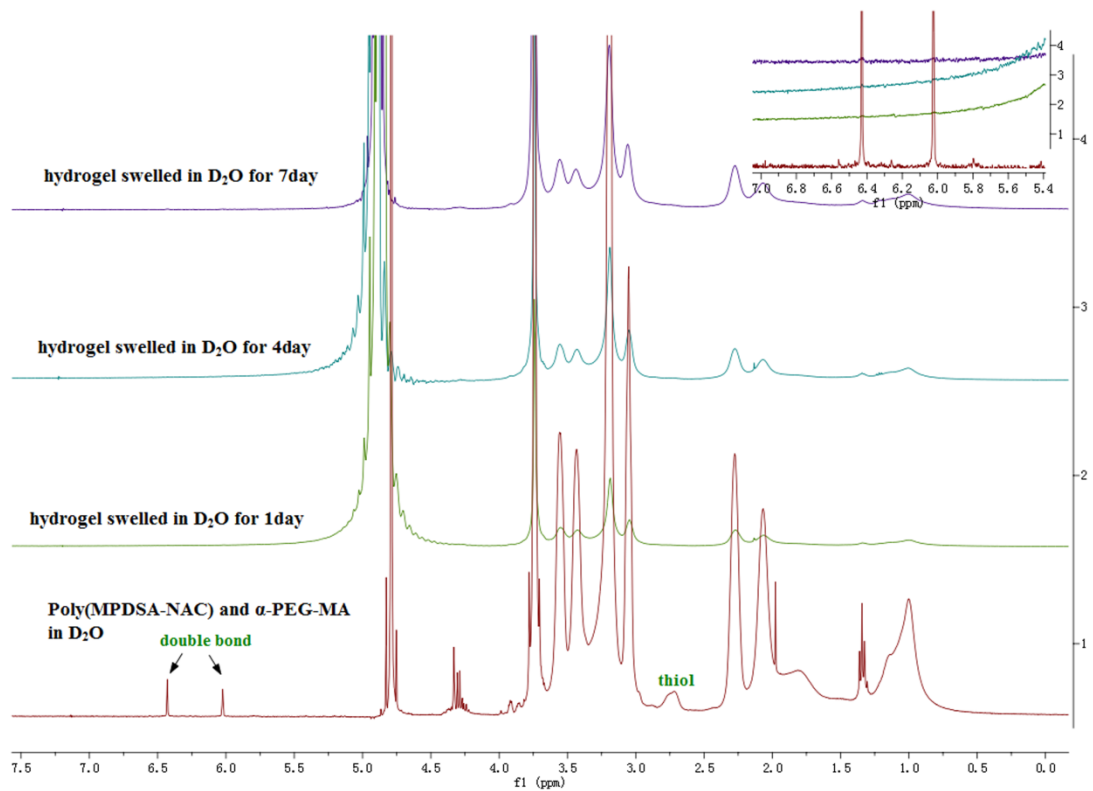

Fig. S1 <sup>1</sup>H NMR spectra of the gel (thiol/ene ratio of 1:1) prepared in PBS (pH 7.4) and swelled in acidic D<sub>2</sub>O for

1, 4 and 7 days (400 MHz)

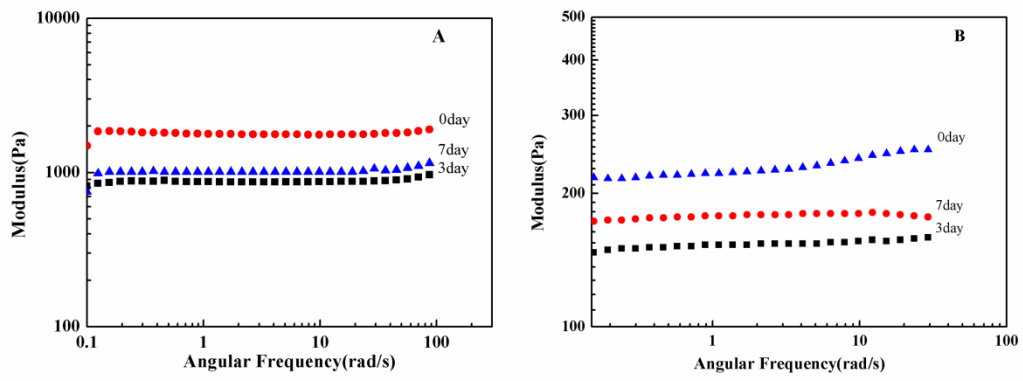

Fig. S2 Changes of storage modulus during swelling. A) Storage modulus changes of hydrogels with thiol/ene ratio of 1:1, and it decreased from original 1.80 to 0.80 kPa after swelled 3 days and then increased to 0.87 kPa after swelling for 7days; B) Storage modulus of hydrogels with thiol/ene ratio of 2:1, and it decreased from original 0.23 to 0.16 kPa after swelled 3 days and then increased to 0.18 kPa after swelling for 7days

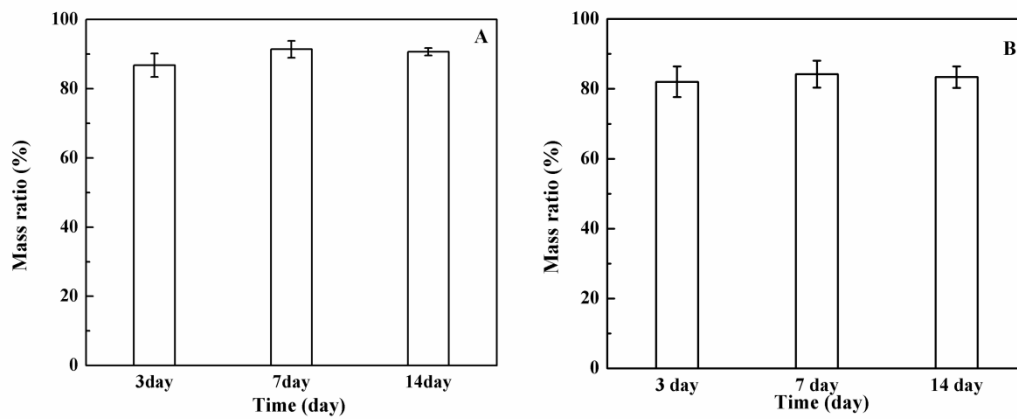

Fig. S3 Changes of dry mass of hydrogels during swelling. A) mass changes of hydrogels with thiol/ene ratio of 1:1, and dry mass was about 87, 91 and 91% of feeding amount after swelling for 3, 7 and 7days, respectively; B) dry mass changes of hydrogels with thiol/ene ratio of 2:1, and dry mass was about 82, 84 and 83 % of feeding amount after swelling for 3, 7 and 14 days, respectively

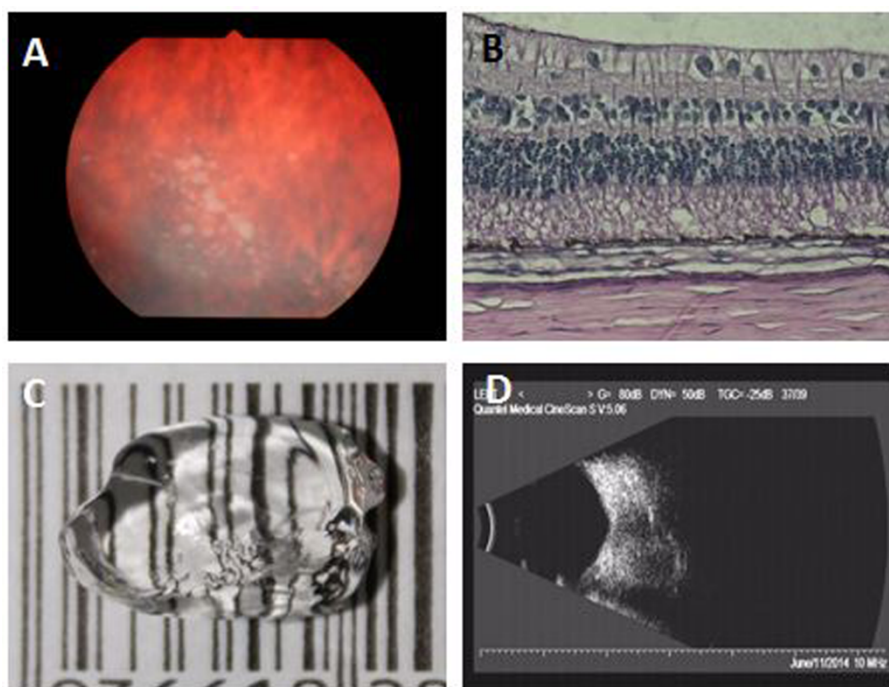

Fig. S4 Photographs of the rabbit eyes with zwitterionic hydrogels of thiol/ene ratio 1:1. (A) Photograph of fundus of one rabbit one month after implanting the zwitterionic hydrogel containing 1:1 of thiol/ene ratio, and several white dots of opacity were observed in the peripheral vitreous; (B) Histopathological examination of rabbit after implanting the zwitterionic hydrogel containing 1:1 of thiol/ene ratio for 1 month; (C) Photograph of the hydrogel containing 1:1 of thiol/ene ratio removed from the vitreous cavity two month after the implantation; (D) Photograph of B-scan ultrasound, the left control eye without surgery.

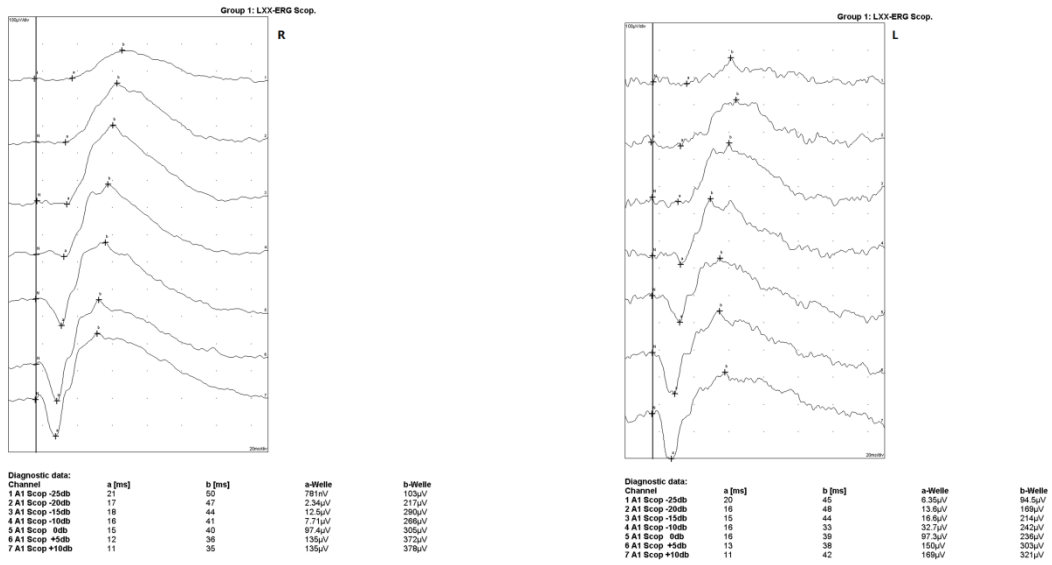

Fig. S5 The ERG of rabbit after implanting the zwitterionic hydrogel containing 1:1 of thiol/ene ratio for 1 month. R was the right eye (novel hydrogel eye), L was the left eye (control eye)
